# Supplementary material for: Contamination of Water and Sediments of Harike Wetland with Phthalate Esters and Associated Risk Assessment
Source: MDPI journal article supplement (doi:10.3390/w15061009), 2023-03-07
Supplement: s1 [file s1]

## Supplementary Tables

Table S1: QA/QC parameters for phthalates extraction and analysis.

| S.No. | Phthalates              | CAS no.  | Log K <sub>ow</sub> | Retention Time (RT) | Linearity (R <sup>2</sup> ) | % Recovery  | LOD (mg/L) | LOQ (mg/L) |
|-------|-------------------------|----------|---------------------|---------------------|-----------------------------|-------------|------------|------------|
| 1.    | Dimethyl phthalate      | 131-11-3 | 1.6634              | 6.2                 | 0.9982                      | 99.42±1.38  | 0.42       | 1.274      |
| 2.    | Diethyl phthalate       | 84-66-2  | 2.6456              | 8.4                 | 0.9988                      | 100.64±0.27 | 0.755      | 2.289      |
| 3.    | Diallyl phthalate       | 131-17-9 | 3.355               | 9.4                 | 0.9884                      | 98.37±0.94  | 0.574      | 1.74       |
| 4.    | Diphenyl phthalate      | 84-62-8  | 4.0968              | 12.7                | 0.9994                      | 100.92±0.66 | 0.583      | 1.766      |
| 5.    | Benzyl butyl phthalate  | 85-68-7  | 4.8445              | 13.95               | 0.9945                      | 99.51±2.62  | 0.635      | 1.925      |
| 6.    | Di-n-butyl phthalate    | 84-74-2  | 4.61                | 14.8                | 0.9945                      | 99.84±1.58  | 0.492      | 1.493      |
| 7.    | Di-cyclohexyl phthalate | 84-61-7  | 6.2026              | 24                  | 0.992                       | 100.83±2.25 | 0.248      | 0.753      |

Table S2: Dimethyl phthalate (DMP) content in water samples collected from different sites and seasons.

| Site                | Winter            | Summer            | Monsoon          |
|---------------------|-------------------|-------------------|------------------|
| 1                   | 2.87 ±0.12        | 3.64±0.29         | 2.52±0.03        |
| 2                   | 3.02± 0.12        | 2.89±0.09         | 2.62±0.07        |
| 3                   | 3.17±0.08         | <b>4.11±0.006</b> | 3.22±0.17        |
| 4                   | <b>3.34±0.32</b>  | 2.87±0.08         | 2.22±0.02        |
| 5                   | 2.74±0.06         | 3.79±0.02         | 4.05±0.04        |
| 6                   | 2.85± 0.03        | 3.39±0.13         | 2.51±0.06        |
| 7                   | 2.48±0.02         | 3.37±0.04         | 4.34±0.16        |
| 8                   | 2.09 ±0.007       | 3.64±0.09         | 2.45±0.06        |
| 9                   | 2.08 ±0.001       | 4.09±0.16         | <b>4.49±1.29</b> |
| 10                  | 2.33±0.005        | 3.37±0.07         | 3.34±0.05        |
| ANOVA summary       |                   |                   |                  |
| Source of variation | Degree of Freedom | F-ratio           | HSD              |
| Season              | 2                 | 75.43***          | 0.784            |
| Site                | 9                 | 14.538***         |                  |
| Season × Site       | 18                | 17.547***         |                  |
| Error               | 60                |                   |                  |
| Total               | 90                |                   |                  |

Data shown are Mean ± SD, n=3. Significant at \*\*\*p≤0.001, \*\*p≤0.01.

**Table S3: Diethyl phthalate (DEP) content in water samples collected from different sites and seasons.**

| Site                 | Winter             | Summer             | Monsoon            |
|----------------------|--------------------|--------------------|--------------------|
| 1                    | 1.37±0.05          | 1.199±0.094        | 1.309±0.017        |
| 2                    | 1.22±0.035         | 1.236±0.01         | 1.796±0.209        |
| 3                    | 1.25±0.077         | <b>2.165±0.044</b> | 1.739±0.082        |
| 4                    | 1.09±0.014         | 1.108±0.05         | 1.432±0.389        |
| 5                    | 1.30±0.212         | 1.963±0.029        | 5.094±1.25         |
| 6                    | 1.29±0.007         | 1.611±0.021        | 1.420±0.389        |
| 7                    | 1.38±0.358         | 1.521±0.038        | 5.039±0.518        |
| 8                    | <b>1.612±0.047</b> | 1.457±0.009        | <b>6.857±0.883</b> |
| 9                    | 1.22±0.13          | 1.395±0.089        | 6.707±1.158        |
| 10                   | 1.42±0.279         | 1.117±0.031        | 7.156±.202         |
| <b>ANOVA summary</b> |                    |                    |                    |
| Source of variation  | Degree of Freedom  | F-ratio            | HSD                |
| Season               | 2                  | 389.808***         | 1.193              |
| Site                 | 9                  | 44.309***          |                    |
| Season × Site        | 18                 | 41.495***          |                    |
| Error                | 60                 |                    |                    |
| Total                | 90                 |                    |                    |

Data shown are Mean ± SD, n=3. Significant at \*\*\*p≤0.001, \*\*p≤0.01.

**Table S4: Diallyl phthalate (DAP) content in water samples collected from different sites and seasons.**

| Site                 | Winter             | Summer              | Monsoon            |
|----------------------|--------------------|---------------------|--------------------|
| 1                    | 16.07±0.157        | 15.801±0.022        | 15.873±0.072       |
| 2                    | 16.047±0.172       | 15.82±0.036         | 15.919±0.07        |
| 3                    | <b>17.69±0.018</b> | 15.809±0.006        | 15.946±0.02        |
| 4                    | 16.52±0.075        | 15.86±0.034         | 16.110±0.036       |
| 5                    | 17.19±0.464        | 15.974±0.242        | 21.157±0.518       |
| 6                    | 17.36±0.349        | 16.11±0.314         | 16.339±0.075       |
| 7                    | 16.46±0.45         | 15.882±0.087        | 19.395±1.098       |
| 8                    | 16.87±0.909        | <b>16.151±0.246</b> | 19.975±0.553       |
| 9                    | 16.95±0.915        | 15.779±0.019        | <b>22.386±1.55</b> |
| 10                   | 16.93±0.303        | 15.976±0.122        | 22.034±0.351       |
| <b>ANOVA summary</b> |                    |                     |                    |
| Source of variation  | Degree of Freedom  | F-ratio             | HSD                |
| Season               | 2                  | 225.338***          | 1.459              |
| Site                 | 9                  | 37.639***           |                    |
| Season × Site        | 18                 | 32.19***            |                    |
| Error                | 60                 |                     |                    |
| Total                | 90                 |                     |                    |

Data shown are Mean ± SD, n=3. Significant at \*\*\*p≤0.001, \*\*p≤0.01.

**Table S5: Diphenyl phthalate (DPP) content in water samples collected from different sites and seasons.**

| Site | Winter            | Summer             | Monsoon      |
|------|-------------------|--------------------|--------------|
| 1    | 1.44±0.017        | <b>2.704±0.055</b> | ND           |
| 2    | 3.26±1.260        | 0.984±0.022        | 1.297±0.339  |
| 3    | <b>6.20±0.042</b> | 2.140±0.028        | 0.773±0.0003 |
| 4    | 3.29±0.208        | 2.203±0.147        | 0.8245±0.011 |

|                     |                   |              |                    |
|---------------------|-------------------|--------------|--------------------|
| 5                   | 4.39±0.255        | 1.612±0.009  | 3.478±1.628        |
| 6                   | 3.73±0.062        | 2.683±0.356  | 0.808±0.008        |
| 7                   | 2.37±0.575        | 2.696±0.110  | 1.736±0.082        |
| 8                   | 2.01±0.178        | 2.294±0.099  | 2.890±1.27         |
| 9                   | 2.19±0.111        | 1.797±0.153  | <b>9.763±1.059</b> |
| 10                  | 0.947±0.197       | 0.835±0.0059 | 2.880±0.825        |
| ANOVA summary       |                   |              |                    |
| Source of variation | Degree of Freedom | F-ratio      | HSD                |
| Season              | 2                 | 26.126***    | 1.615              |
| Site                | 9                 | 27.697***    |                    |
| Season × Site       | 18                | 42.849***    |                    |
| Error               | 60                |              |                    |
| Total               | 90                |              |                    |

Data shown are Mean ± SD, n=3. Significant at \*\*\*p≤0.001, \*\*p≤0.01.

**Table S6: Benzyl butyl phthalate (BBP) content in water samples collected from different sites and seasons.**

| Site                | Winter            | Summer             | Monsoon             |
|---------------------|-------------------|--------------------|---------------------|
| 1                   | 6.975±0.060       | ND                 | 8.334±0.0009        |
| 2                   | 9.701±0.220       | ND                 | 10.931±0.095        |
| 3                   | ND                | <b>2.576±0.042</b> | 10.022±0.255        |
| 4                   | ND                | ND                 | 10.360±1.119        |
| 5                   | 2.37±0.05         | 2.323±0.012        | 15.26±0.396         |
| 6                   | ND                | ND                 | 11.804±0.154        |
| 7                   | ND                | ND                 | 15.955±0.166        |
| 8                   | <b>11.57±0.53</b> | ND                 | 18.033±0.544        |
| 9                   | 6.976±0.013       | ND                 | 19.950±0.906        |
| 10                  | 3.926±0.025       | ND                 | <b>26.758±0.955</b> |
| ANOVA summary       |                   |                    |                     |
| Source of variation | Degree of Freedom | F-ratio            | HSD                 |
| Season              | 2                 | 12610***           | 1.092               |
| Site                | 9                 | 430.144***         |                     |
| Season × Site       | 18                | 390.610***         |                     |
| Error               | 60                |                    |                     |
| Total               | 90                |                    |                     |

Data shown are Mean ± SD, n=3. Significant at \*\*\*p≤0.001, \*\*p≤0.01.

**Table S7: Dibutyl phthalate (DBP) content in water samples collected from different sites and seasons.**

| Site                | Winter              | Summer              | Monsoon            |
|---------------------|---------------------|---------------------|--------------------|
| 1                   | 9.49±0.014          | 11.114±2.317        | 8.193±0.001        |
| 2                   | 9.91±0.069          | 10.653±1.632        | 8.667±0.154        |
| 3                   | 18.219±0.134        | <b>17.156±0.003</b> | 8.798±0.364        |
| 4                   | 13.802±1.975        | 11.726±0.001        | 8.694±0.208        |
| 5                   | <b>19.766±0.107</b> | 12.388±2.986        | 8.484±0.046        |
| 6                   | 15.913±0.033        | 10.641±1.777        | 8.721±0.361        |
| 7                   | 13.827±2.808        | 13.399±0.239        | 8.266±0.001        |
| 8                   | 9.868±0.264         | 8.401±0.009         | 8.393±0.051        |
| 9                   | 10.816±0.018        | 13.432±3.05         | 9.332±0.533        |
| 10                  | 8.515±0.048         | 11.077±2.77         | <b>9.793±0.009</b> |
| ANOVA summary       |                     |                     |                    |
| Source of variation | Degree of Freedom   | F-ratio             | HSD                |

|               |    |            |     |
|---------------|----|------------|-----|
| Season        | 2  | 90.516 *** | 3.9 |
| Site          | 9  | 18.496***  |     |
| Season × Site | 18 | 9.919***   |     |
| Error         | 60 |            |     |
| Total         | 90 |            |     |

Data shown are Mean ± SD, n=3. Significant at \*\*\*p≤0.001, \*\*p≤0.01.

**Table S8: Dicyclohexyl phthalate (DcHP) content in water samples collected from different sites and seasons.**

| Site                | Winter            | Summer       | Monsoon      |
|---------------------|-------------------|--------------|--------------|
| 1                   | ND                | ND           | ND           |
| 2                   | ND                | ND           | ND           |
| 3                   | 12.15±0.057       | ND           | ND           |
| 4                   | ND                | ND           | ND           |
| 5                   | 12.156±0.090      | ND           | ND           |
| 6                   | 12.306±0.024      | ND           | ND           |
| 7                   | ND                | ND           | ND           |
| 8                   | 12.41±0.075       | ND           | 15.424±0.670 |
| 9                   | ND                | 12.215±0.082 | 22.593±6.25  |
| 10                  | ND                | ND           | 23.973±1.236 |
| ANOVA summary       |                   |              |              |
| Source of variation | Degree of Freedom | F-ratio      | HSD          |
| Season              | 2                 | 145.759 ***  | 3.550        |
| Site                | 9                 | 120.593***   |              |
| Season × Site       | 18                | 113.811***   |              |
| Error               | 60                |              |              |
| Total               | 90                |              |              |

Data shown are Mean ± SD, n=3. Significant at \*\*\*p≤0.001, \*\*p≤0.01.

**Table S9: Dimethyl phthalate (DMP) content in sediment samples collected from different sites and seasons.**

| Site                | Winter            | Summer           | Monsoon        |
|---------------------|-------------------|------------------|----------------|
| 1                   | 6.6926±.03895     | 15.4494 ±.07435  | 6.3337±.06169  |
| 2                   | 8.7068±0.06169    | 8.3790 ±0.02175  | 6.6420 ±.10381 |
| 3                   | ND                | 9.3681±1.21406   | ND             |
| 4                   | ND                | 9.7983±0.6098    | ND             |
| 5                   | ND                | 12.1483±0.59695  | ND             |
| 6                   | 7.0942±0.04508    | 17.2962 ±0.24519 | 7.0137±0.00218 |
| 7                   | 8.2202±1.79361    | 8.5435±0.86289   | ND             |
| 8                   | 6.5415 ±0.00573   | 13.1554±0.07751  | ND             |
| 9                   | 17.2177±0.09946   | 7.3939±0.02056   | ND             |
| 10                  | 8.1081±0.50896    | 7.0194±0.14434   | 6.6934±0.029   |
| ANOVA summary       |                   |                  |                |
| Source of variation | Degree of Freedom | F-ratio          | HSD            |
| Season              | 2                 | 2314***          | 1.351          |
| Site                | 9                 | 269.368***       |                |
| Season × Site       | 18                | 224.097***       |                |
| Error               | 60                |                  |                |
| Total               | 90                |                  |                |

Data shown are Mean  $\pm$  SD, n=3. Significant at \*\*\*p $\leq$ 0.001, \*\*p $\leq$ 0.01.

**Table S10: Diethyl phthalate (DEP) content in sediment samples collected from different sites and seasons.**

| Site                       | Winter                               | Summer                                | Monsoon                              |
|----------------------------|--------------------------------------|---------------------------------------|--------------------------------------|
| 1                          | ND                                   | 3.8548 $\pm$ .02722                   | 3.7802 $\pm$ 0.55423                 |
| 2                          | 4.2764 $\pm$ 0.66619                 | 3.1010 $\pm$ .01074                   | 3.1031 $\pm$ 0.01783                 |
| 3                          | ND                                   | 3.1738 $\pm$ .02722                   | 4.3247 $\pm$ 0.02281                 |
| 4                          | ND                                   | 3.2168 $\pm$ 0.02262                  | 3.2592 $\pm$ 0.08378                 |
| 5                          | ND                                   | 4.4669 $\pm$ 0.72715                  | 4.3845 $\pm$ 0.5642                  |
| 6                          | ND                                   | <b>14.6796<math>\pm</math>1.79803</b> | <b>5.5688<math>\pm</math>1.45449</b> |
| 7                          | <b>9.7155<math>\pm</math>1.59329</b> | 4.0971 $\pm$ 0.30788                  | 3.1522 $\pm$ 0.06154                 |
| 8                          | 3.2705 $\pm$ 0.12538                 | 13.3284 $\pm$ 0.20839                 | 3.407 $\pm$ 0.08857                  |
| 9                          | 7.2555 $\pm$ 0.0462                  | 7.6362 $\pm$ 0.2475                   | 3.2626 $\pm$ 0.05387                 |
| 10                         | 3.4407 $\pm$ 0.03566                 | 3.1951 $\pm$ 0.0324                   | 3.5078 $\pm$ 0.05329                 |
| <b>ANOVA summary</b>       |                                      |                                       |                                      |
| <b>Source of variation</b> | <b>Degree of Freedom</b>             | <b>F-ratio</b>                        | <b>HSD</b>                           |
| Season                     | 2                                    | 262.042***                            | 1.646                                |
| Site                       | 9                                    | 94.528***                             |                                      |
| Season $\times$ Site       | 18                                   | 101.417***                            |                                      |
| Error                      | 60                                   |                                       |                                      |
| Total                      | 90                                   |                                       |                                      |

Data shown are Mean  $\pm$  SD, n=3. Significant at \*\*\*p $\leq$ 0.001, \*\*p $\leq$ 0.01.

**Table S11: Diallyl phthalate (DAP) content in sediment samples collected from different sites and seasons.**

| Site                       | Winter                                | Summer                               | Monsoon                              |
|----------------------------|---------------------------------------|--------------------------------------|--------------------------------------|
| 1                          | ND                                    | 77.0881 $\pm$ 0.01797                | 49.7222 $\pm$ 2.35627                |
| 2                          | 47.7786 $\pm$ 0.17625                 | <b>82.8745<math>\pm</math>0.2145</b> | 48.6002 $\pm$ 1.31488                |
| 3                          | 47.5867 $\pm$ 0.17971                 | 69.6976 $\pm$ 0.41034                | 47.4157 $\pm$ 0.17095                |
| 4                          | ND                                    | 67.9446 $\pm$ 0.13133                | 49.4377 $\pm$ 2.21596                |
| 5                          | ND                                    | 48.4843 $\pm$ 1.20221                | <b>58.9257<math>\pm</math>7.9152</b> |
| 6                          | ND                                    | 57.7331 $\pm$ 1.2711                 | 48.1233 $\pm$ 0.35504                |
| 7                          | <b>57.8988<math>\pm</math>0.84279</b> | 50.4666 $\pm$ 0.87367                | ND                                   |
| 8                          | 48.279 $\pm$ 0.11082                  | 56.8159 $\pm$ 0.80455                | 47.342 $\pm$ 0.06175                 |
| 9                          | 48.9393 $\pm$ 1.18678                 | 55.1409 $\pm$ 0.53775                | 47.9988 $\pm$ 0.0615                 |
| 10                         | 47.3977 $\pm$ 0.11428                 | 48.0145 $\pm$ 0.79510                | 47.5669 $\pm$ 0.29353                |
| <b>ANOVA summary</b>       |                                       |                                      |                                      |
| <b>Source of variation</b> | <b>Degree of Freedom</b>              | <b>F-ratio</b>                       | <b>HSD</b>                           |
| Season                     | 2                                     | 2720***                              | 4.809                                |
| Site                       | 9                                     | 248.9***                             |                                      |
| Season $\times$ Site       | 18                                    | 458.31***                            |                                      |
| Error                      | 60                                    |                                      |                                      |
| Total                      | 90                                    |                                      |                                      |

Data shown are Mean  $\pm$  SD, n=3. Significant at \*\*\*p $\leq$ 0.001, \*\*p $\leq$ 0.01.

**Table S12: Diphenyl phthalate (DPP) content in sediment samples collected from different sites and seasons.**

| Site                 | Winter                 | Summer               | Monsoon               |
|----------------------|------------------------|----------------------|-----------------------|
| 1                    | ND                     | 3.0553±0.05321       | <b>91.1823±6.3245</b> |
| 2                    | 7.2114±1.64613         | 5.3445±0.88634       | 3.0453±0.1331         |
| 3                    | ND                     | 10.7057±2.7117       | 13.838±11.5605        |
| 4                    | ND                     | ND                   | 73.5299±1.9646        |
| 5                    | ND                     | 14.3233±0.85987      | 41.6235±10.769        |
| 6                    | ND                     | 16.2011±0.5599       | 8.8075±0.9014         |
| 7                    | <b>117.71±11.09698</b> | 9.9991±0.7603        | ND                    |
| 8                    | 4.194±0.51518          | <b>23.2789±15.15</b> | ND                    |
| 9                    | ND                     | 6.4193±0.2499        | 5.8782±0.0953         |
| 10                   | ND                     | 8.8025±2.147         | ND                    |
| <b>ANOVA summary</b> |                        |                      |                       |
| Source of variation  | Degree of Freedom      | F-ratio              | HSD                   |
| Season               | 2                      | 72.988***            | 13.613                |
| Site                 | 9                      | 72.966***            |                       |
| Season × Site        | 18                     | 134.948***           |                       |
| Error                | 60                     |                      |                       |
| Total                | 90                     |                      |                       |

Data shown are Mean ± SD, n=3. Significant at \*\*\*p≤0.001, \*\*p≤0.01.

**Table S13: Benzyl butyl phthalate (BBP) content in sediment samples collected from different sites and seasons.**

| Site                 | Winter               | Summer                 | Monsoon                |
|----------------------|----------------------|------------------------|------------------------|
| 1                    | 7.2411±0.03522       | 8.3326±0.04899         | 13.2037±0.24058        |
| 2                    | 27.3986±1.524        | 9.1893±0.05910         | 7.3898±0.148           |
| 3                    | 8.5176±0.0857        | 8.584±0.16544          | 7.8841±0.0303          |
| 4                    | 9.5319±0.0136        | 8.7622±0.03086         | 18.6403±0.316          |
| 5                    | 16.857±0.059         | 24.5197±0.09379        | 8.2934±0.0223          |
| 6                    | 7.3419±0.0205        | <b>41.4616±0.23064</b> | <b>71.2323±0.27893</b> |
| 7                    | <b>83.089±0.9562</b> | 19.6437±0.1086         | 36.4153±0.199          |
| 8                    | 8.2026±0.9429        | 25.6506±0.61697        | 52.617±0.0927          |
| 9                    | 10.1406±2.9138       | 28.0511±0.19682        | 32.22±0.207            |
| 10                   | 7.1785±0.0779        | 7.2272±0.02301         | 65.654±0.0829          |
| <b>ANOVA summary</b> |                      |                        |                        |
| Source of variation  | Degree of Freedom    | F-ratio                | HSD                    |
| Season               | 2                    | 3758***                | 1.943                  |
| Site                 | 9                    | 3335***                |                        |
| Season × Site        | 18                   | 2621***                |                        |
| Error                | 60                   |                        |                        |
| Total                | 90                   |                        |                        |

Data shown are Mean ± SD, n=3. Significant at \*\*\*p≤0.001, \*\*p≤0.01.

**Table S14: Dibutyl phthalate (DBP) content in sediment samples collected from different sites and seasons**

| Site                | Winter            | Summer         | Monsoon        |
|---------------------|-------------------|----------------|----------------|
| 1                   | 24.9584±0.0363    | 39.903±0.0231  | 27.0271±0.0446 |
| 2                   | 26.5395±0.9746    | 45.754±0.0573  | ND             |
| 3                   | 25.707±0.0878     | 30.6523±6.1692 | 24.417±0.05098 |
| 4                   | 25.602±0.1139     | 33.5489±0.106  | 25.4901±1.027  |
| 5                   | 28.3903±0.3374    | 63.223±0.1277  | 24.7054±0.012  |
| 6                   | 25.098±0.1134     | 32.278±0.0026  | 56.422±0.4415  |
| 7                   | 30.147±0.2097     | 24.7735±0.1210 | 25.292±0.27078 |
| 8                   | 24.356±0.0141     | 25.949±1.4706  | 27.1652±2.7028 |
| 9                   | 26.2803±0.0568    | 28.299±0.2169  | 31.777±0.097   |
| 10                  | 24.539±0.0067     | 26.8588±0.2376 | 25.0697±0.0929 |
| ANOVA summary       |                   |                |                |
| Source of variation | Degree of Freedom | F-ratio        | HSD            |
| Season              | 2                 | 451.479***     | 3.740          |
| Site                | 9                 | 139.531***     |                |
| Season × Site       | 18                | 222.236***     |                |
| Error               | 60                |                |                |
| Total               | 90                |                |                |

Data shown are Mean ± SD, n=3. Significant at \*\*\*p≤0.001, \*\*p≤0.01.

**Table S15: Dicyclohexyl phthalate (DcHP) content in sediment samples collected from different sites and seasons.**

| Site                | Winter            | Summer          | Monsoon        |
|---------------------|-------------------|-----------------|----------------|
| 1                   | ND                | ND              | 36.9267±0.0576 |
| 2                   | 37.9648±1.5427    | ND              | ND             |
| 3                   | ND                | ND              | ND             |
| 4                   | ND                | ND              | 37.218±0.072   |
| 5                   | ND                | ND              | 36.914±0.14956 |
| 6                   | ND                | ND              | ND             |
| 7                   | 38.3921±0.5015    | 37.3686±0.00102 | 40.2293±1.193  |
| 8                   | ND                | ND              | 37.978±0.2211  |
| 9                   | ND                | 36.2185±0.047   | ND             |
| 10                  | ND                | 36.926±0.0576   | 39.405±0.5256  |
| ANOVA summary       |                   |                 |                |
| Source of variation | Degree of Freedom | F-ratio         | HSD            |
| Season              | 2                 | 13020***        | 1.109          |
| Site                | 9                 | 3188***         |                |
| Season × Site       | 18                | 8230***         |                |
| Error               | 60                |                 |                |
| Total               | 90                |                 |                |

Data shown are Mean ± SD, n=3. Significant at \*\*\*p≤0.001, \*\*p≤0.01.

**Table S16: Concentration of phthalates esters (PEs) in water samples as reported in literatures from India and other countries.**

| Country         | Freshwater bodies                         | DMP             | DEP              | DBP               | BBP          | DAP          | DCHP            | DPP | References           |
|-----------------|-------------------------------------------|-----------------|------------------|-------------------|--------------|--------------|-----------------|-----|----------------------|
| <b>Spain</b>    | Muga, Fluvia, Ter, Besos, Llobregat, Ebro | ND              | 50-280ng/L       | NP                | <LOQ–20 ng/L | NP           | NP              | NP  | <a href="#">[1]</a>  |
| <b>Malaysia</b> | Selangor                                  | 2–15 ng/L       | 10–49 ng/L       | 47–213 ng/L       | 4–13 ng/L    | NP           | NP              | NP  | <a href="#">[2]</a>  |
| <b>China</b>    | Lake Shichahai                            | 0.081 µg/L      | 0.009 µg/L       | 0.066 µg/L        | 0.183 µg/L   | 0.009 µg/L   | ND              | NP  | <a href="#">[3]</a>  |
| <b>India</b>    | Kaveri River                              | ND-94 ng/L      | 36-520 ng/L      | ND-372 ng/L       | 5.4-145 ng/L | NP           | ND              | NP  | <a href="#">[4]</a>  |
| <b>China</b>    | Chaohu Lake                               | 0.015–3.67      | 0.006–0.283      | 0.070–17.5        | NP           | NP           | NP              | NP  | <a href="#">[5]</a>  |
| <b>China</b>    | Xi River                                  | 1.34-21.1 µg/L  | 0.163-2.37 µg/L  | 0.137- 9.96 µg/L  | NP           | NP           | NP              | NP  | <a href="#">[6]</a>  |
| <b>China</b>    | Pu River                                  | 0.296-23.0 µg/L | 0.127-1.60 µg/L  | 0.591- 9.67 µg/L  | NP           | NP           | NP              | NP  | <a href="#">[6]</a>  |
| <b>China</b>    | Jiulong                                   | 0.034–0.15 µg/L | 0.014–0.091 µg/L | 0.31–0.51 µg/L    | NP           | NP           | NP              | NP  | <a href="#">[7]</a>  |
| <b>China</b>    | Huai River                                | <310 ng/L       | 25–310 ng/L      | 431–1299 ng/L     | 76–1351 ng/L | NP           | NP              | NP  | <a href="#">[8]</a>  |
| <b>India</b>    | Sunderban wetland                         | 0.04–0.06 µg/L  | ND–0.4 µg/L      | 0.32–0.88 µg/L    | ND–0.1 µg/L  | NP           | NP              | NP  | <a href="#">[9]</a>  |
| <b>India</b>    | River Ganga                               | 0.03–0.05 µg/L  | 0.04–2.14 µg/L   | ND–2.27 µg/L      | ND–0.13 µg/L | NP           | NP              | NP  | <a href="#">[9]</a>  |
| <b>China</b>    | Yellow River                              | 47.9-946.3 ng/L | 78.6-679.1 ng/L  | 79.89-2030.1 ng/L | ND-5.9 ng/L  | ND-51.9 ng/L | ND              | ND  | <a href="#">[10]</a> |
| <b>India</b>    | Vellar River                              | ND-0.019 µg/L   | 0.088–0.598 µg/L | 1.055–86.03 µg/L  | ND           | NP           | 0.015–58.3 µg/L | NP  | <a href="#">[11]</a> |

ND – not detected, NP – not performed

Table S17: Concentration of phthalate esters (PEs) in sediments samples as reported in literatures from India and other countries.



| Country  | Sediments                      | DMP                     | DEP                              | DBP                                | BBP                              | DAP                    | DCHP                                | DPP              | References           |
|----------|--------------------------------|-------------------------|----------------------------------|------------------------------------|----------------------------------|------------------------|-------------------------------------|------------------|----------------------|
| India    | Gomti                          | BDL–<br>490<br>ng/L     | BDL–<br>350 ng/L                 | BDL-<br>340 ng/L                   | ND                               | NP                     | NP                                  | NP               | <a href="#">[12]</a> |
| India    | Kaveri                         | ND-<br>3.71<br>ng/L     | ND-<br>185.2<br>ng/L             | ND-664<br>ng/L                     | ND-7.8<br>ng/L                   | NP                     | NP                                  | NP               | <a href="#">[4]</a>  |
| China    | Jiulong                        | ND-<br>5.1<br>µg/kg     | ND-3.5<br>µg/kg                  | 6.1–19.3<br>µg/kg                  | NP                               | NP                     | NP                                  | NP               | <a href="#">[13]</a> |
| Malaysia | Sembrong<br>River              | 0.01 -<br>0.04<br>mg/kg | 0.24 -<br>1.29<br>mg/kg          | 0.21 -<br>15.63<br>mg/kg           | 0.04 -<br>1.00<br>mg/kg          | NP                     | NP                                  | NP               | <a href="#">[14]</a> |
| China    | Yellow<br>river delta          | 0.002–<br>0.060<br>mg/g | ND–<br>0.004<br>mg/g             | 0.245–<br>2.058<br>mg/g            | ND                               | ND                     | NP                                  | NP               | <a href="#">[15]</a> |
| China    | Qiantang<br>River<br>sediments | 0.053<br>µg/g<br>dw     | 0.018<br>µg/g dw                 | 0.170<br>µg/g dw                   | 0.0018<br>µg/g dw                | 0.0006<br>µg/g dw      | 0.0014<br>µg/g dw                   | NP               | <a href="#">[16]</a> |
| China    | Yellow<br>River                | 49.0-<br>216.5<br>ng/g  | 15.8-<br>752.9<br>ng/g           | 63.4-<br>1386.7<br>ng/g            | 0.6-37.9<br>ng/g                 | 23.7-<br>473.9<br>ng/g | n.d.~113<br>.6 ng/g                 | n.d.~4.3<br>ng/g | <a href="#">[17]</a> |
| China    | Songhua<br>River               | 0.003<br>ug/gd<br>w     | 0.017<br>ug/gdw                  | 0.852<br>ug/gdw                    | 0.005<br>ug/gdw                  | NP                     | NP                                  | NP               | <a href="#">[18]</a> |
| China    | Taihu Lake                     | 3.500<br>ug/gd<br>w     | 2.290<br>ug/gdw                  | 1.750<br>ug/gdw                    | 1.300<br>ug/gdw                  | NP                     | NP                                  | NP               | <a href="#">[19]</a> |
| India    | Vellar<br>River                | ND                      | ND-<br>0.018<br>µg/kg<br>dry wt. | 0.002–<br>0.35<br>µg/kg<br>dry wt. | ND-<br>0.004<br>µg/kg<br>dry wt. | NP                     | 0.007–<br>0.542<br>µg/kg<br>dry wt. | NP               | <a href="#">[11]</a> |

|              |                      |                      |                                  |                                  |                  |    |                                     |    |                      |
|--------------|----------------------|----------------------|----------------------------------|----------------------------------|------------------|----|-------------------------------------|----|----------------------|
| <b>India</b> | Thamirapara<br>River | ND                   | ND-<br>0.019<br>µg/kg<br>dry wt. | ND-<br>0.514<br>µg/kg<br>dry wt. | ND               | ND | 0.001–<br>2.635<br>µg/kg<br>dry wt. | ND | <a href="#">[11]</a> |
| <b>China</b> | Qixinghe<br>wetland  | ND<br>36.04<br>µg/kg | ND<br>60.13<br>µg/kg             | 8.15<br>48.78<br>µg/kg           | ND 28.4<br>µg/kg | ND | ND                                  | ND | <a href="#">[20]</a> |

ND – not detected, NP – not performed.

## References

1. Sánchez-Avila, J.; Tauler, R.; Lacorte, S. Organic micropollutants in coastal waters from NW Mediterranean Sea: Sources distribution and potential risk. *Environ. Int.* **2012**, *46*, 50–62. <https://doi.org/10.1016/j.envint.2012.04.013>.
2. Santhi, V.A.; Mustafa, A.M. Assessment of organochlorine pesticides and plasticisers in the Selangor River basin and possible pollution sources. *Environ. Monit. Assess.* **2013**, *185*, 1541–1554. <https://doi.org/10.1007/s10661-012-2649-2>.
3. Zheng, X.; Zhang, B.T.; Teng, Y. Distribution of phthalate acid esters in lakes of Beijing and its relationship with anthropogenic activities. *Sci. Total Environ.* **2014**, *476*, 107–113. <https://doi.org/10.1016/j.scitotenv.2013.12.111>.
4. Selvaraj, K.K.; Sundaramoorthy, G.; Ravichandran, P.K.; Girijan, G.K.; Sampath, S.; Ramaswamy, B.R. Phthalate esters in water and sediments of the Kaveri River, India: Environmental levels and ecotoxicological evaluations. *Environ. Geochem. Health* **2015**, *37*, 83–96. <https://doi.org/10.1007/s10653-014-9632-5>.
5. He, W.; Qin, N.; Kong, X.; Liu, W.; He, Q.; Ouyang, H.; Xu, F. Spatio-temporal distributions and the ecological and health risks of phthalate esters (PAEs) in the surface water of a large, shallow Chinese lake. *Sci. Total Environ.* **2013**, *461*, 672–680. <https://doi.org/10.1016/j.scitotenv.2013.05.049>.
6. Li, B.; Hu, X.; Liu, R.; Zeng, P.; Song, Y. Occurrence and distribution of phthalic acid esters and phenols in Hun River Watersheds. *Environ. Earth Sci.* **2015**, *73*, 5095–5106. <https://doi.org/10.1007/s12665-015-4299-5>.
7. Li, R.; Liang, J.; Duan, H.; Gong, Z. Spatial distribution and seasonal variation of phthalate esters in the Jiulong River estuary, Southeast China. *Mar. Pollut. Bull.* **2017**, *122*, 38–46. <https://doi.org/10.1016/j.marpolbul.2017.05.062>.
8. Niu, S.; Zhang, C. Endocrine disrupting compounds from the source water of the Huai River (Huainan City), China. *Arch. Environ. Contam. Toxicol.* **2018**, *74*, 471–483. <https://doi.org/10.1007/s00244-017-0445-2>.
9. Chakraborty, P.; Shappell, N.W.; Mukhopadhyay, M.; Onanong, S.; Rex, K.R.; Snow, D. Surveillance of plasticizers, bisphenol A, steroids and caffeine in surface water of River Ganga and Sundarban wetland along the Bay of Bengal: Occurrence, sources, estrogenicity screening and ecotoxicological risk assessment. *Water Res.* **2021**, *190*, 116668. <https://doi.org/10.1016/j.watres.2020.116668>.
10. Zhao, X.; Shen, J.M.; Zhang, H.; Li, X.; Chen, Z.L.; Wang, X.C. The occurrence and spatial distribution of phthalate esters (PAEs) in the Lanzhou section of the Yellow River. *Environ. Sci. Pollut. Res.* **2020**, *27*, 19724–19735. <https://doi.org/10.1007/s11356-020-08443-7>.
11. Elaiyaraja, A.; Mayilsamy, M.; Vimalkumar, K.; Nikhil, N.P.; Noorani, P.M.; Bommuraj, V.; Rajendran, R.B. Aquatic and human health risk assessment of Humanogenic Emerging Contaminants (HECs), Phthalate Esters from the Indian Rivers. *Chemosphere* **2022**, *306*, 135624. <https://doi.org/10.1016/j.chemosphere.2022.135624>.

12. Srivastava, A.; Sharma, V.P.; Tripathi, R.; Kumar, R.; Patel, D.K.; Mathur, P.K. Occurrence of phthalic acid esters in Gomti River Sediment, India. *Environ. Monit. Assess.* **2010**, *169*, 397–406. <https://doi.org/10.1007/s10661-009-1182-4>.
13. Li, R.L.; Liang, J.; Gong, Z.B.; Zhang, N.N.; Duan, H.L. Occurrence, spatial distribution, historical trend and ecological risk of phthalate esters in the Jiulong River, Southeast China. *Sci. Total Environ.* **2017**, *580*, 388–397. <https://doi.org/10.1016/j.scitotenv.2016.11.190>.
14. Muhamad, A.; Karim, A.T.A.; Zakaria, N.F.; Rapok, K.J.A. Determination of phthalate ester compounds in Sembrong river sediment. *J. Techno-Soc.* **2016**, *8*, 2.
15. Yang, H.; Xie, W.; Liu, Q.; Liu, J.; Yu, H.; Lu, Z. Distribution of phthalate esters in topsoil: A case study in the Yellow River Delta, China. *Environ. Monit. Assess.* **2013**, *185*, 8489–8500. <https://doi.org/10.1007/s10661-013-3190-7>.
16. Sun, J.; Huang, J.; Zhang, A.; Liu, W.; Cheng, W. Occurrence of phthalate esters in sediments in Qiantang River, China and inference with urbanization and river flow regime. *J. Hazard. Mater.* **2013**, *248*, 142–149. <https://doi.org/10.1016/j.jhazmat.2012.12.057>.
17. Zhou, L.J.; Zhang, Q.; Shi, L.L. The formulation methods of priority water pollutants and environmental quality standards in the EU and their reference significance to China. *Environ. Monit. Forewarn.* **2019**, *11*, 1–9. <https://doi.org/10.3969/j.issn.1674-6732.2019.01.001>.
18. Yang, Y.; Wang, H.; Chang, Y.; Yan, G.; Chu, Z.; Zhao, Z.; Li, L.; Li, Z.; Wu, T. Distributions, compositions, and ecological risk assessment of polycyclic aromatic hydrocarbons and phthalic acid esters in surface sediment of Songhua river, China. *Mar. Pollut. Bull.* **2019**, *152*, 110923. <https://doi.org/10.1016/j.marpolbul.2020.110923>.
19. Gao, X.; Li, J.; Wang, X.; Zhou, J.; Fan, B.; Li, W.; Liu, Z. Exposure and ecological risk of phthalate esters in the Taihu Lake basin, China. *Ecotoxicol. Environ. Safe* **2019**, *171*, 564–570. <https://doi.org/10.1016/j.ecoenv.2019.01.001>.
20. Wang, H.; Liang, H.; Gao, D. Occurrence and distribution of phthalate esters (PAEs) in wetland sediments. *J. For. Res.* **2017**, *28*, 1241–1248. <https://doi.org/10.1007/s11676-017-0371-1>.

## Supplementary Figures

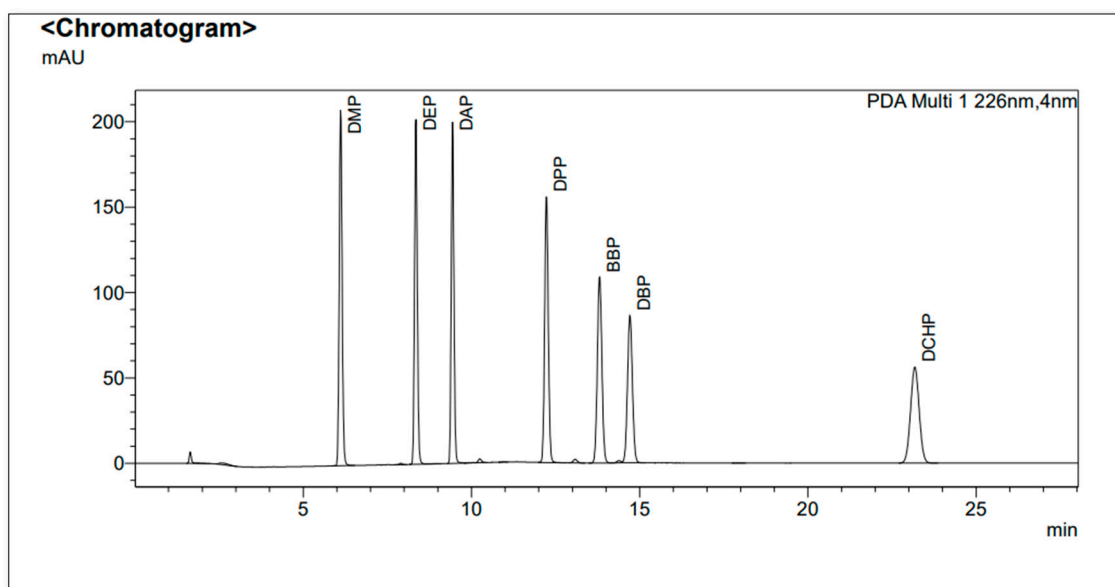

Fig. S1: UHPLC chromatogram of phthalates standard showing DMP, DEP, DAP, DPP, BBP, DBP and DcHP

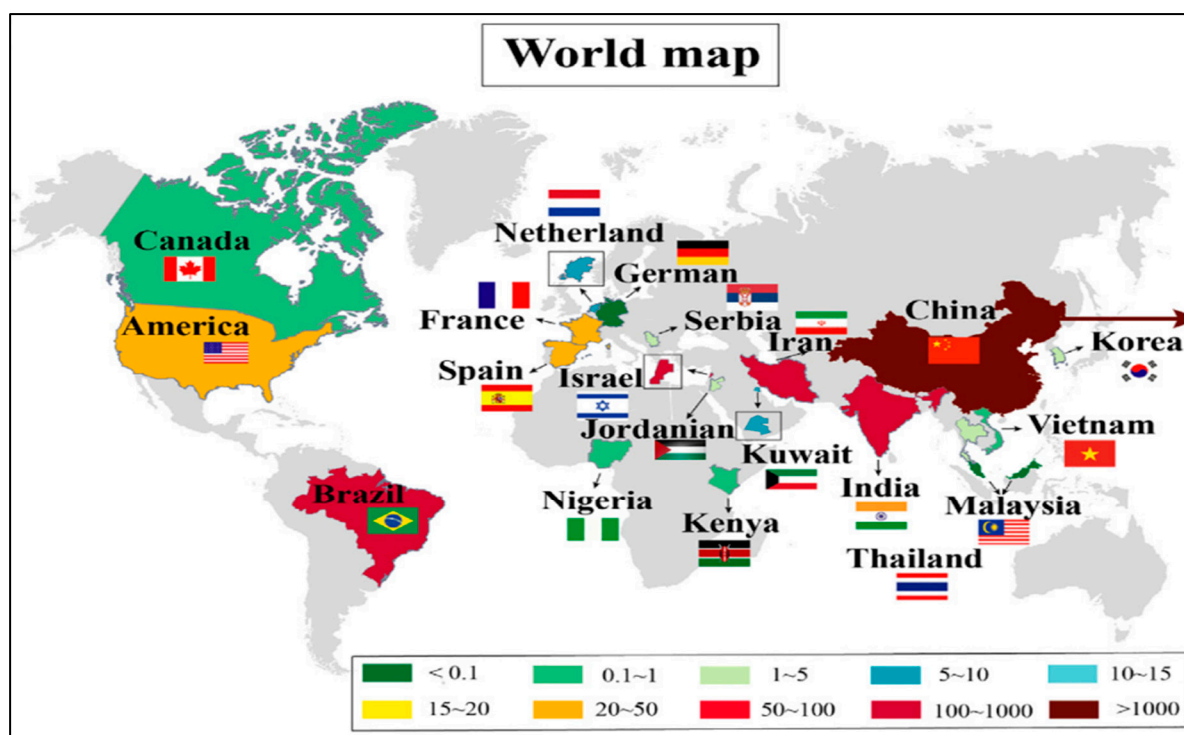

Fig S2: World map showing maximum exposure concentration of PEs in rivers, lakes and seas in some countries ( $\mu\text{g/L}$ ) (Zhang et al., 2019).
